# Supplementary material
Source: Springer Nature journal article supplement (https://www.springermedizin.de/resource/supplementary/13256_2006_8_MOESM2_ESM.pdf/9645596)

**Meckel's diverticulum ?**

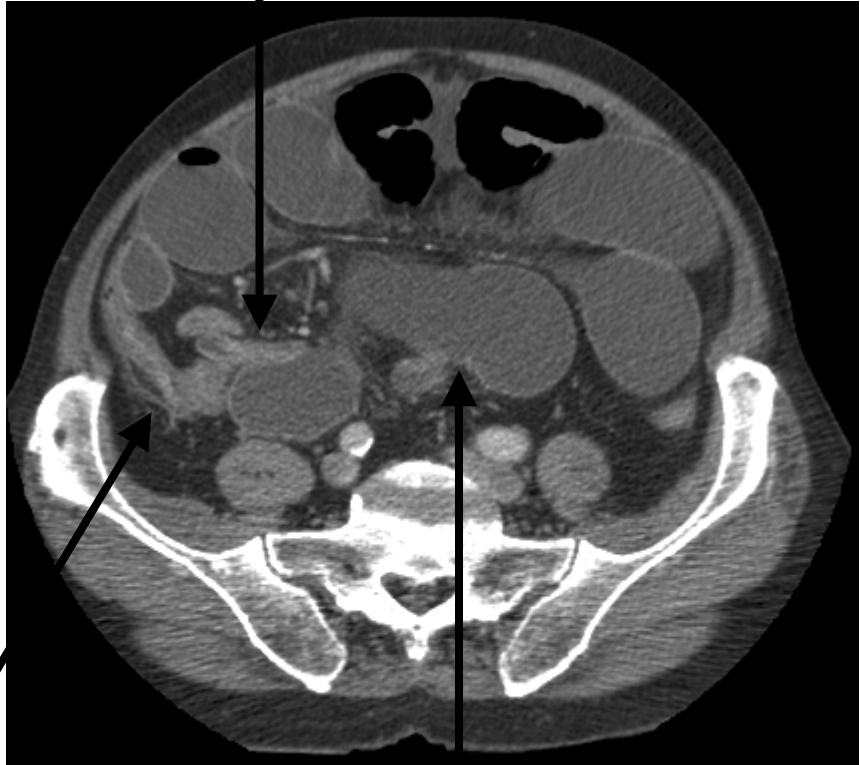

**Collapsed large bowel**

**Small bowel dilatation**

Supplement: MOESM2 [file 9645596]
